# Supplementary material
Source: PubMed Central journal article supplement (PMC5854794)
Supplement: npp2017178x1.pdf [file npp2017178x1.pdf]

# Figure S1

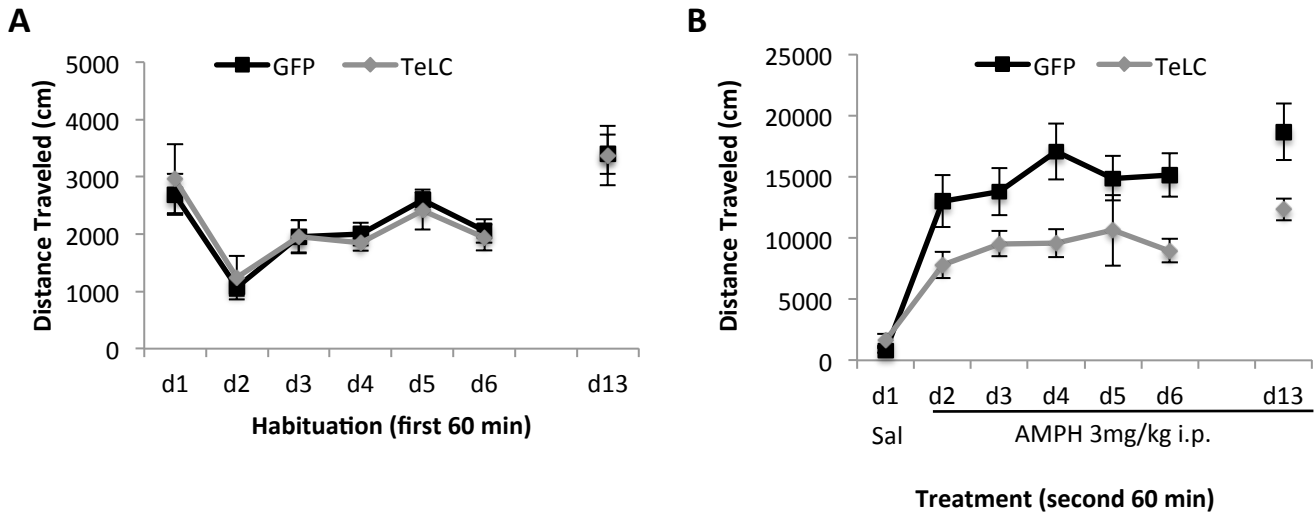

**Figure S1: Silencing transmission from PV+ GABAergic interneurons of the NAc impairs behavioral sensitization to repeated AMPH administration in female mice.** Mice were treated as in Fig. 2A. A) Cumulative distance traveled (cm) during the first 60 min of habituation to the open field. rmANOVA showed a significant main effect of days  $F_{6,36}=17.39$   $p<0.001$ , but no effect of virus  $F_{1,6}=0.008$   $p=0.93$ . B) Cumulative distance traveled (cm) each day during the 60 min following injection of either saline (Sal) or 3mg/kg AMPH (i.p.) in the open field. Comparing the response to saline with the response to the first AMPH treatment (d1 and d2), rmANOVA revealed a significant main effect of days  $F_{6,36}=38.08$ ,  $p<0.001$ , however the effect of virus though qualitatively similar to the data in Fig. 2C did not achieve statistical significance ( $F_{1,6}=4.22$ ,  $p=0.08$ ).  $n=4$  GFP and 4 TeLC female mice.

**Figure S2**

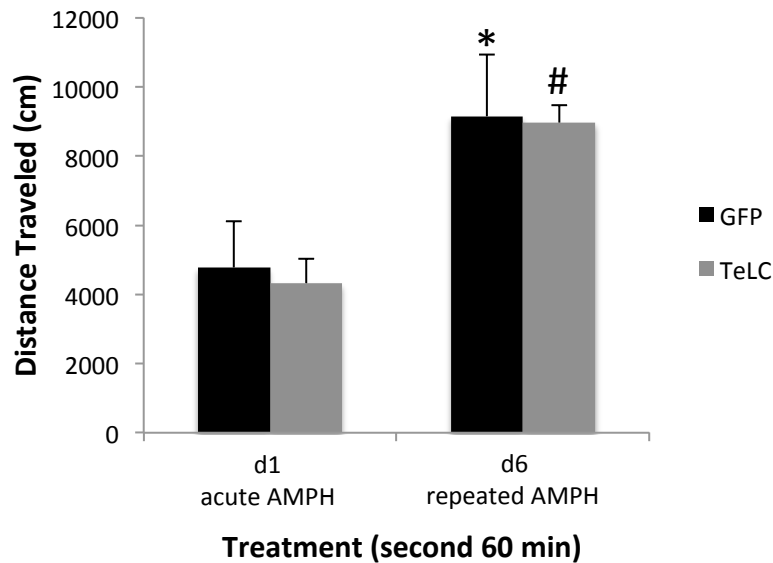

**Figure S2: Cre-recombinase induced expression of TeLC is required to inhibit locomotor sensitization to AMPH.** Male inbred C57BL6/J mice (which lack Cre recombinase expression) were injected in the NAc with either the GFP or TeLC viruses, then 3 week later mice were injected with 3 mg/kg AMPH (i.p.) over 6 consecutive days. rmANOVA showed that repeated AMPH induced sensitization over days in this cohort ( $F_{1,7} = 21.56, p=0.002$ ). There was no significant effect of virus ( $F_{1,7}=0.43, p=0.84$ ), and there was no virus by days interaction ( $F_{1,7} = 0.19, p=0.89$ ).  $n=4$  mice/virus; \* $p<0.05$ , d6 repeated AMPH vs. d1 acute AMPH for GFP; # $p<0.05$  d6 repeated AMPH vs. d1 acute AMPH for TeLC.

**Figure S3**

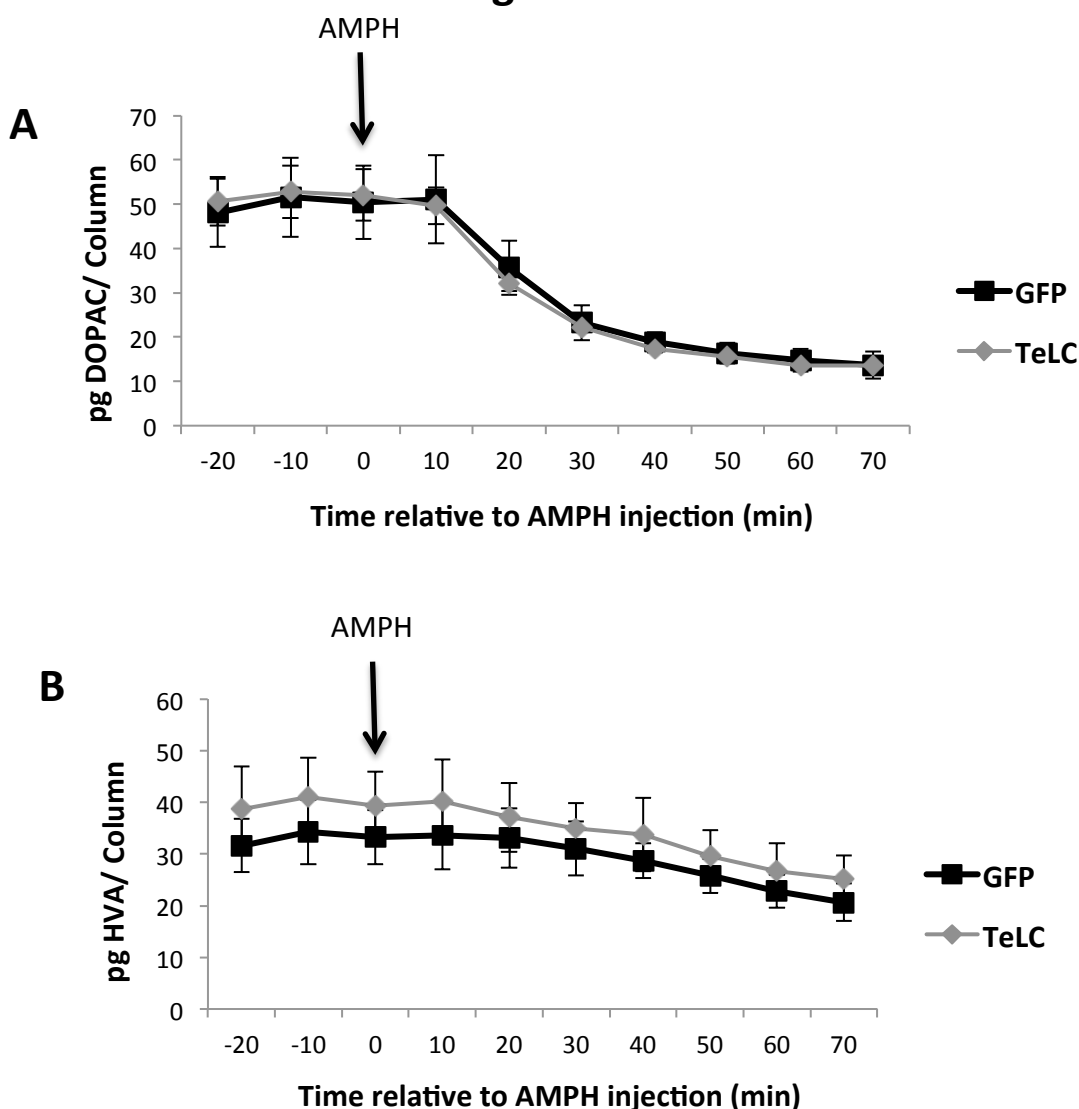

**Figure S3. Silencing PV+ GABAergic interneurons of the NAc does not alter basal or AMPH-induced extracellular levels of DA metabolites in the NAc.** A. DOPAC in microdialysis samples collected as in **Fig. 3**. There was no difference between viral groups at baseline (rmANOVA effect of virus:  $F_{1,10}=0.033, p=0.85$ ). AMPH significantly depressed levels in both groups (rmANOVA effect of time:  $F_{6,60}=59.5, p<0.001$ ) such that there was no significant effect of the virus ( $F_{1,10}=0.10, p=0.75$ ) and the time by virus interaction was not significant. B. HVA in microdialysis samples collected as in **Fig. 3**. There was no effect of virus on levels at baseline ( $F_{1,10}=0.52, p=0.48$ ). AMPH significantly depressed levels in both viral groups (effect of time:  $F_{6,60}=15.0, p<0.001$ ) with no significant effect of virus ( $F_{1,10}=0.39, p=0.54$ ).  $n=6$  GFP,  $n=6$  TeLC mice.

**Figure S4**

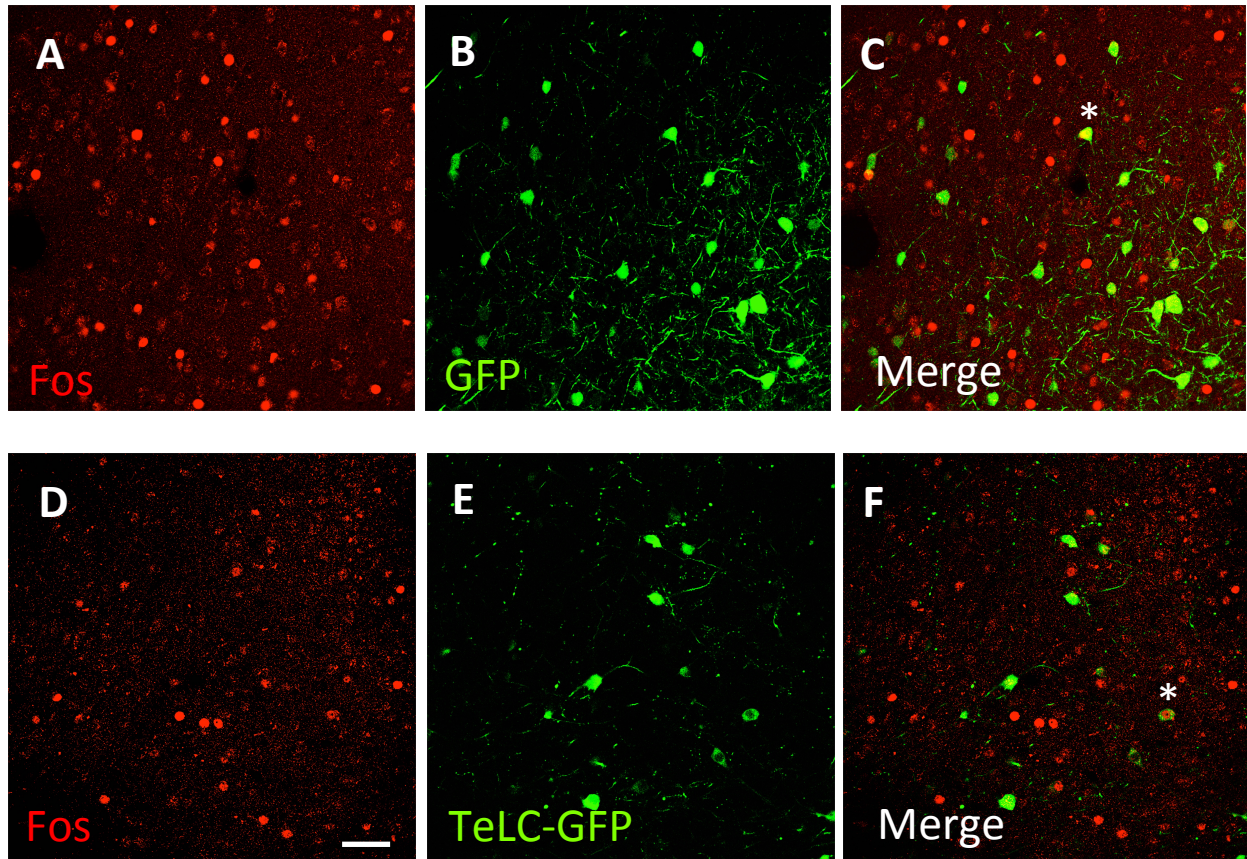

**Figure S4. AMPH induced Fos occurs predominantly in cells that are outside of the PV+ virally-infected population of neurons in the NAc.** *Pvalb*-Cre mice stereotaxically injected with GFP or TeLC viruses were euthanized 2 hr following a challenge dose of 3 mg/kg AMPH (i.p.) in the open field. Fos expression in the NAc was compared to the location of GFP (A-C) and TeLC-GFP (D-F) infected cells. Only occasional cells marked by the white asterisk (\*) were double labeled for both Fos and GFP/TeLC-GFP (C,F). Scale bar = 50 $\mu$ m.
